# Supplementary material for: Cross-sectional association between medical expenses and intellectual activity in community-dwelling older adults
Source: Springer Nature journal article supplement (doi:10.1186/s12199-017-0672-1), 2017-08-25
Supplement: MOESM1 [file 14304418]

Additional file 1: Table S1. Characteristics of the study population responding to the questionnaire (n = 12,747)

|                                           | Males (n = 5,413) |         | Females (n = 7,334) |         | <i>P</i> <sup>a</sup> |
|-------------------------------------------|-------------------|---------|---------------------|---------|-----------------------|
|                                           | n                 | (%)     | n                   | (%)     |                       |
| <b>Demographics</b>                       |                   |         |                     |         |                       |
| Age at survey (years)                     |                   |         |                     |         |                       |
| 65-67                                     | 2,439             | (45.1%) | 3,611               | (49.2%) | <0.001                |
| 68-70                                     | 2,974             | (54.9%) | 3,723               | (50.8%) |                       |
| Health insurance                          |                   |         |                     |         |                       |
| National Insurance                        | 5,190             | (95.9%) | 7,131               | (97.2%) | <0.001                |
| Medical insurance for later-stage elderly | 81                | (1.5%)  | 28                  | (0.4%)  |                       |
| Livelihood subsidies                      | 142               | (2.6%)  | 175                 | (2.4%)  |                       |
| Family size                               |                   |         |                     |         |                       |
| 1                                         | 599               | (11.1%) | 1,271               | (17.3%) | <0.001                |
| 2                                         | 2,726             | (50.4%) | 3,837               | (52.3%) |                       |
| 3                                         | 1,214             | (22.4%) | 1,392               | (19.0%) |                       |
| ≥4                                        | 790               | (14.6%) | 771                 | (10.5%) |                       |
| Missing                                   | 84                | (1.6%)  | 63                  | (0.9%)  |                       |
| Body mass index                           |                   |         |                     |         |                       |
| Normal                                    | 3,920             | (72.4%) | 5,255               | (71.7%) | <0.001                |
| Underweight                               | 243               | (4.5%)  | 837                 | (11.4%) |                       |
| Obese                                     | 1,176             | (21.7%) | 1,167               | (15.9%) |                       |
| Missing                                   | 74                | (1.4%)  | 75                  | (1.0%)  |                       |

Additional file 1: Table S1. Continued

|                                        | Males (n = 5,413) |         | Females (n = 7,334) |         | <i>P</i> <sup>a</sup> |
|----------------------------------------|-------------------|---------|---------------------|---------|-----------------------|
|                                        | n                 | (%)     | n                   | (%)     |                       |
| Health behaviors                       |                   |         |                     |         |                       |
| Health checkups                        |                   |         |                     |         |                       |
| Present                                | 3,636             | (67.2%) | 4,395               | (59.9%) | <0.001                |
| Absent                                 | 1,777             | (32.8%) | 2,939               | (40.1%) |                       |
| Smoking habit                          |                   |         |                     |         |                       |
| Never-smoker                           | 972               | (18.0%) | 6,121               | (83.5%) | <0.001                |
| Ex-smoker                              | 3,082             | (56.9%) | 647                 | (8.8%)  |                       |
| Current smoker                         | 1,253             | (23.1%) | 387                 | (5.3%)  |                       |
| Missing                                | 106               | (2.0%)  | 179                 | (2.4%)  |                       |
| Number of years smoking                |                   |         |                     |         |                       |
| 0                                      | 980               | (18.1%) | 6,122               | (83.5%) | <0.001                |
| 1-14                                   | 589               | (10.9%) | 292                 | (4.0%)  |                       |
| 15-29                                  | 865               | (16.0%) | 229                 | (3.1%)  |                       |
| ≥30                                    | 2,898             | (53.5%) | 536                 | (7.3%)  |                       |
| Missing                                | 81                | (1.5%)  | 155                 | (2.1%)  |                       |
| Frequency of alcohol consumption       |                   |         |                     |         |                       |
| None                                   | 1,232             | (22.8%) | 3,802               | (51.8%) | <0.001                |
| Social                                 | 929               | (17.2%) | 1,857               | (25.3%) |                       |
| Occasional                             | 972               | (18.0%) | 981                 | (13.4%) |                       |
| Daily                                  | 2,227             | (41.1%) | 639                 | (8.7%)  |                       |
| Missing                                | 53                | (1.0%)  | 55                  | (0.7%)  |                       |
| Frequency of exercise (hours per week) |                   |         |                     |         |                       |
| ≥5                                     | 1,275             | (23.6%) | 1,201               | (16.4%) | <0.001                |
| 3-4                                    | 793               | (14.6%) | 1,212               | (16.5%) |                       |
| 1-2                                    | 1,185             | (21.9%) | 1,895               | (25.8%) |                       |
| <1                                     | 2,065             | (38.1%) | 2,901               | (39.6%) |                       |
| Missing                                | 95                | (1.8%)  | 125                 | (1.7%)  |                       |
| Walking time (minutes per day)         |                   |         |                     |         |                       |
| ≥60                                    | 2,387             | (44.1%) | 3,269               | (44.6%) | 0.012                 |
| 30-59                                  | 1,657             | (30.6%) | 2,384               | (32.5%) |                       |
| <30                                    | 1,282             | (23.7%) | 1,578               | (21.5%) |                       |
| Missing                                | 87                | (1.6%)  | 103                 | (1.4%)  |                       |
| Dietary habits (dietary variety score) |                   |         |                     |         |                       |
| Low                                    | 2,624             | (48.5%) | 2,062               | (28.1%) | <0.001                |
| Medium                                 | 1,501             | (27.7%) | 2,317               | (31.6%) |                       |
| High                                   | 1,208             | (22.3%) | 2,873               | (39.2%) |                       |
| Missing                                | 80                | (1.5%)  | 82                  | (1.1%)  |                       |

Additional file 1: Table S1. Continued

|                                         | Males (n = 5,413) |         | Females (n = 7,334) |         | <i>P</i> <sup>a</sup> |
|-----------------------------------------|-------------------|---------|---------------------|---------|-----------------------|
|                                         | n                 | (%)     | n                   | (%)     |                       |
| <b>Oral Health</b>                      |                   |         |                     |         |                       |
| <i>Dental health behaviors</i>          |                   |         |                     |         |                       |
| Use of extra cleaning devices           |                   |         |                     |         |                       |
| Yes                                     | 2,384             | (44.0%) | 4,515               | (61.6%) | <0.001                |
| No                                      | 2,819             | (52.1%) | 2,565               | (35.0%) |                       |
| Missing                                 | 210               | (3.9%)  | 254                 | (3.5%)  |                       |
| Frequency of daily tooth brushing       |                   |         |                     |         |                       |
| Three or more times                     | 861               | (15.9%) | 1,998               | (27.2%) | <0.001                |
| Twice                                   | 2,396             | (44.3%) | 4,274               | (58.3%) |                       |
| Less than twice                         | 1,943             | (35.9%) | 808                 | (11.0%) |                       |
| Missing                                 | 213               | (3.9%)  | 254                 | (3.5%)  |                       |
| Frequency of bedtime tooth brushing     |                   |         |                     |         |                       |
| Daily                                   | 3,471             | (64.1%) | 6,118               | (83.4%) | <0.001                |
| Sometimes                               | 599               | (11.1%) | 581                 | (7.9%)  |                       |
| Almost never                            | 1,130             | (20.9%) | 380                 | (5.2%)  |                       |
| Missing                                 | 213               | (3.9%)  | 255                 | (3.5%)  |                       |
| <i>Oral function</i>                    |                   |         |                     |         |                       |
| Having difficulty in chewing hard foods |                   |         |                     |         |                       |
| Absent                                  | 3,923             | (72.5%) | 5,729               | (78.1%) | <0.001                |
| Present                                 | 1,280             | (23.6%) | 1,347               | (18.4%) |                       |
| Missing                                 | 210               | (3.9%)  | 258                 | (3.5%)  |                       |
| Choking on your tea and soup            |                   |         |                     |         |                       |
| Absent                                  | 4,197             | (77.5%) | 5,704               | (77.8%) | 0.541                 |
| Present                                 | 1,000             | (18.5%) | 1,365               | (18.6%) |                       |
| Missing                                 | 216               | (4.0%)  | 265                 | (3.6%)  |                       |
| Having dry mouth                        |                   |         |                     |         |                       |
| Absent                                  | 3,988             | (73.7%) | 5,409               | (73.8%) | 0.537                 |
| Present                                 | 1,204             | (22.2%) | 1,653               | (22.5%) |                       |
| Missing                                 | 221               | (4.1%)  | 272                 | (3.7%)  |                       |
| Use of dentures                         |                   |         |                     |         |                       |
| Yes                                     | 2,184             | (40.3%) | 2,496               | (34.0%) | <0.001                |
| No                                      | 3,003             | (55.5%) | 4,547               | (62.0%) |                       |
| Missing                                 | 226               | (4.2%)  | 291                 | (4.0%)  |                       |

Additional file 1: Table S1. Continued

|                                                                  | Males (n = 5,413) |         | Females (n = 7,334) |         | <i>P</i> <sup>a</sup> |
|------------------------------------------------------------------|-------------------|---------|---------------------|---------|-----------------------|
|                                                                  | n                 | (%)     | n                   | (%)     |                       |
| <b>Social capital</b>                                            |                   |         |                     |         |                       |
| Social participation (number of social groups)                   |                   |         |                     |         |                       |
| 0                                                                | 1,827             | (33.8%) | 1,969               | (26.8%) | <0.001                |
| 1                                                                | 1,524             | (28.2%) | 1,977               | (27.0%) |                       |
| 2                                                                | 952               | (17.6%) | 1,495               | (20.4%) |                       |
| ≥3                                                               | 1,019             | (18.8%) | 1,771               | (24.1%) |                       |
| Missing                                                          | 91                | (1.7%)  | 122                 | (1.7%)  |                       |
| Social support (number of people able to give emotional support) |                   |         |                     |         |                       |
| Four or more persons                                             | 703               | (13.0%) | 2,040               | (27.8%) | <0.001                |
| Two to three persons                                             | 2,280             | (42.1%) | 4,008               | (54.6%) |                       |
| One person                                                       | 1,603             | (29.6%) | 871                 | (11.9%) |                       |
| Nobody                                                           | 667               | (12.3%) | 258                 | (3.5%)  |                       |
| Missing                                                          | 160               | (3.0%)  | 157                 | (2.1%)  |                       |
| Social networks (frequency of meeting friends)                   |                   |         |                     |         |                       |
| Nearly every day                                                 | 663               | (12.2%) | 1,062               | (14.5%) | <0.001                |
| Several times per week                                           | 1,220             | (22.5%) | 2,389               | (32.6%) |                       |
| Several times per month                                          | 1,495             | (27.6%) | 2,202               | (30.0%) |                       |
| Several times per year                                           | 1,227             | (22.7%) | 1,039               | (14.2%) |                       |
| Almost never                                                     | 657               | (12.1%) | 485                 | (6.6%)  |                       |
| Missing                                                          | 151               | (2.8%)  | 157                 | (2.1%)  |                       |
| <b>Neighborhood environment</b>                                  |                   |         |                     |         |                       |
| Access to public facilities                                      |                   |         |                     |         |                       |
| Good                                                             | 3,312             | (61.2%) | 4,724               | (64.4%) | 0.001                 |
| Poor                                                             | 1,977             | (36.5%) | 2,471               | (33.7%) |                       |
| Missing                                                          | 124               | (2.3%)  | 139                 | (1.9%)  |                       |
| Access to public transport                                       |                   |         |                     |         |                       |
| Good                                                             | 4,819             | (89.0%) | 6,588               | (89.8%) | 0.245                 |
| Poor                                                             | 462               | (8.5%)  | 594                 | (8.1%)  |                       |
| Missing                                                          | 132               | (2.4%)  | 152                 | (2.1%)  |                       |

Additional file 1: Table S1. Continued

|                                                             | Males (n = 5,413) |         | Females (n = 7,334) |         | <i>P</i> <sup>a</sup> |
|-------------------------------------------------------------|-------------------|---------|---------------------|---------|-----------------------|
|                                                             | n                 | (%)     | n                   | (%)     |                       |
| <b>Physical and mental functioning</b>                      |                   |         |                     |         |                       |
| Basic activities of daily living                            |                   |         |                     |         |                       |
| Good                                                        | 5,224             | (96.5%) | 7,148               | (97.5%) | 0.006                 |
| Impaired                                                    | 110               | (2.0%)  | 104                 | (1.4%)  |                       |
| Missing                                                     | 79                | (1.5%)  | 82                  | (1.1%)  |                       |
| Self-rated health                                           |                   |         |                     |         |                       |
| Very good                                                   | 684               | (12.6%) | 1,001               | (13.6%) | <0.001                |
| Rather good                                                 | 3,643             | (67.3%) | 5,143               | (70.1%) |                       |
| Rather poor                                                 | 658               | (12.2%) | 781                 | (10.6%) |                       |
| Very poor                                                   | 292               | (5.4%)  | 282                 | (3.8%)  |                       |
| Missing                                                     | 136               | (2.5%)  | 127                 | (1.7%)  |                       |
| Health-related quality of life (Physical Component Summary) |                   |         |                     |         |                       |
| High                                                        | 1,860             | (34.4%) | 2,458               | (33.5%) | 0.602                 |
| Medium                                                      | 1,686             | (31.1%) | 2,333               | (31.8%) |                       |
| Low                                                         | 1,758             | (32.5%) | 2,410               | (32.9%) |                       |
| Missing                                                     | 109               | (2.0%)  | 133                 | (1.8%)  |                       |
| Health-related quality of life (Mental Component Summary)   |                   |         |                     |         |                       |
| High                                                        | 1,848             | (34.1%) | 2,084               | (28.4%) | <0.001                |
| Medium                                                      | 1,805             | (33.3%) | 2,600               | (35.5%) |                       |
| Low                                                         | 1,651             | (30.5%) | 2,517               | (34.3%) |                       |
| Missing                                                     | 109               | (2.0%)  | 133                 | (1.8%)  |                       |
| Sleep disturbance                                           |                   |         |                     |         |                       |
| Absent                                                      | 3,829             | (70.7%) | 4,814               | (65.6%) | <0.001                |
| Present                                                     | 1,389             | (25.7%) | 2,251               | (30.7%) |                       |
| Missing                                                     | 195               | (3.6%)  | 269                 | (3.7%)  |                       |
| Depression                                                  |                   |         |                     |         |                       |
| Absent                                                      | 3,987             | (73.7%) | 5,617               | (76.6%) | <0.001                |
| Present                                                     | 1,266             | (23.4%) | 1,567               | (21.4%) |                       |
| Missing                                                     | 160               | (3.0%)  | 150                 | (2.0%)  |                       |
| Cognitive functioning                                       |                   |         |                     |         |                       |
| Intact                                                      | 4,396             | (81.2%) | 6,465               | (88.2%) | <0.001                |
| Poor                                                        | 936               | (17.3%) | 783                 | (10.7%) |                       |
| Missing                                                     | 81                | (1.5%)  | 86                  | (1.2%)  |                       |

Additional file 1: Table S1. Continued

|                                         | Males (n = 5,413) |         | Females (n = 7,334) |         | <i>P</i> <sup>a</sup> |
|-----------------------------------------|-------------------|---------|---------------------|---------|-----------------------|
|                                         | n                 | (%)     | n                   | (%)     |                       |
| <b>Higher-level functional capacity</b> |                   |         |                     |         |                       |
| Total score                             |                   |         |                     |         |                       |
| Good (score ≥12)                        | 2,794             | (51.6%) | 5,383               | (73.4%) | <0.001                |
| Impaired (score ≤11)                    | 2,449             | (45.2%) | 1,799               | (24.5%) |                       |
| Missing                                 | 170               | (3.1%)  | 152                 | (2.1%)  |                       |
| Instrumental activities of daily living |                   |         |                     |         |                       |
| Good (score = 5)                        | 4403              | (81.3%) | 6942                | (94.7%) | <0.001                |
| Impaired (score ≤4)                     | 865               | (16.0%) | 267                 | (3.6%)  |                       |
| Missing                                 | 145               | (2.7%)  | 125                 | (1.7%)  |                       |
| Intellectual activity                   |                   |         |                     |         |                       |
| Good (score = 4)                        | 3510              | (64.8%) | 5454                | (74.4%) | <0.001                |
| Impaired (score ≤3)                     | 1748              | (32.3%) | 1746                | (23.8%) |                       |
| Missing                                 | 155               | (2.9%)  | 134                 | (1.8%)  |                       |
| Social role                             |                   |         |                     |         |                       |
| Good (score = 4)                        | 1913              | (35.3%) | 4316                | (58.8%) | <0.001                |
| Impaired (score ≤3)                     | 3338              | (61.7%) | 2874                | (39.2%) |                       |
| Missing                                 | 162               | (3.0%)  | 144                 | (2.0%)  |                       |

<sup>a</sup>Differences between males and females were analyzed using Fisher's exact test.
