# Supplementary material for: Cross-sectional association between medical expenses and intellectual activity in community-dwelling older adults
Source: Springer Nature journal article supplement (doi:10.1186/s12199-017-0672-1), 2017-08-25
Supplement: MOESM2 [file 14304418]

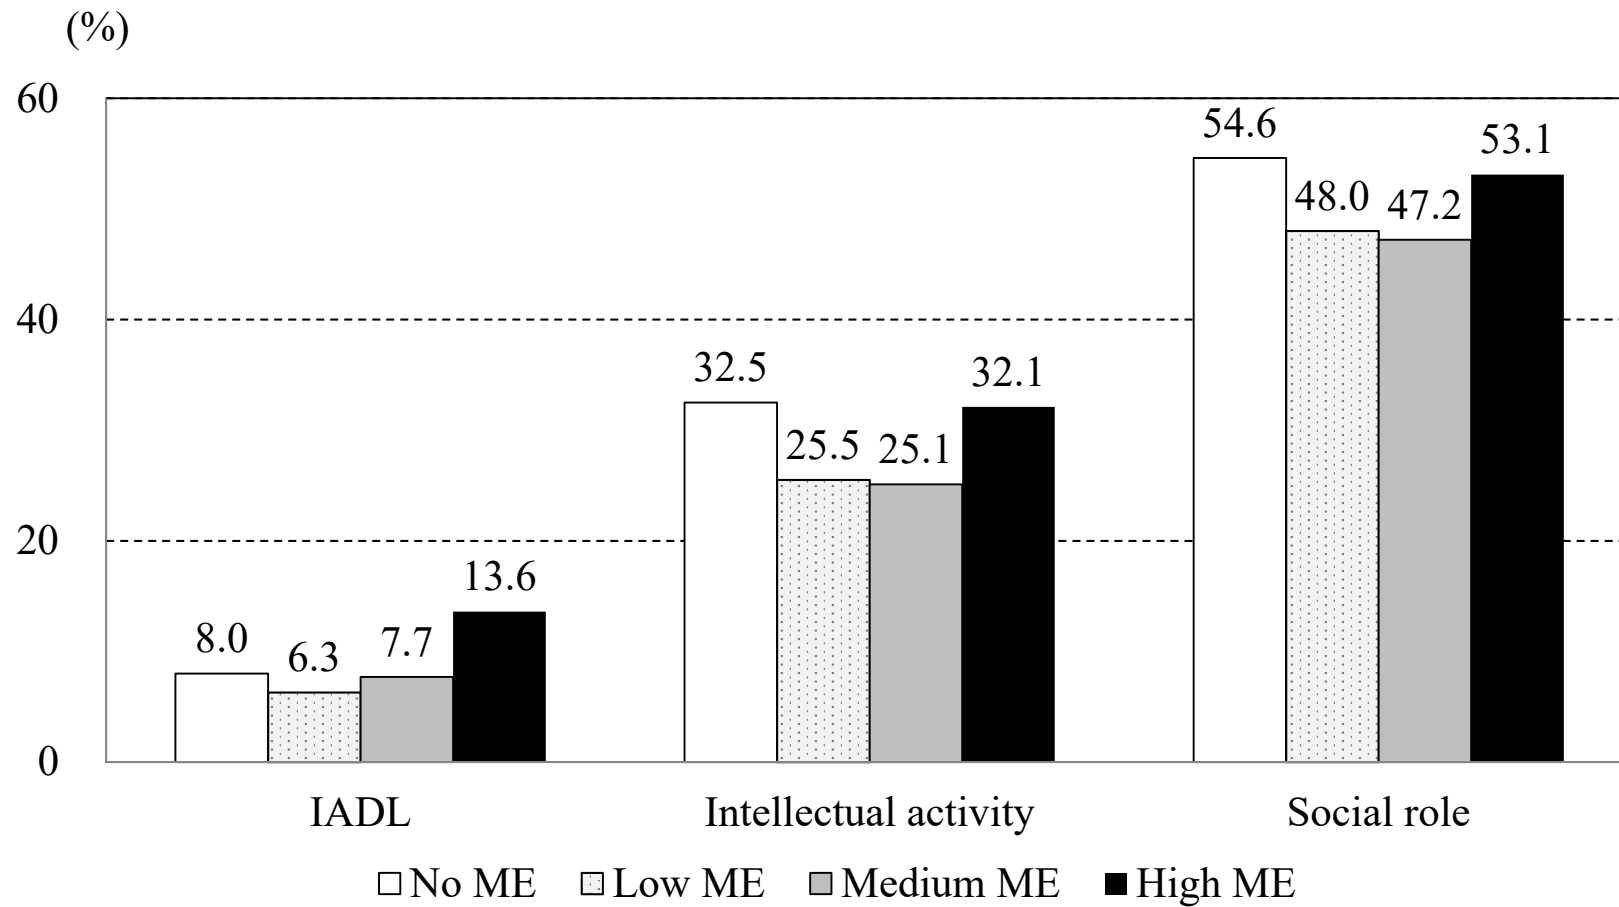

Additional file 2: Figure S1. Percentage of participants with impaired capacity in each subscale of higher-level functional capacity according to medical expenses. *IADL* instrumental activities of daily living, *ME* medical expenses
